# Supplementary material for: Remarkable Enhancement of the Hole Mobility in Several Organic Small‐Molecules, Polymers, and Small‐Molecule:Polymer Blend Transistors by Simple Admixing of the Lewis Acid p‐Dopant B(C6F5)3
Source: PubMed Central journal article supplement (PMC5770661; doi:10.1002/advs.201700290), 2017-10-05
Supplement: ADVS-5-na-s001.pdf [file ADVS-5-na-s001.pdf]

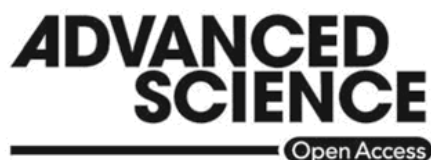

## Supporting Information

for *Adv. Sci.*, DOI: 10.1002/adv.201700290

Remarkable Enhancement of the Hole Mobility in Several Organic Small-Molecules, Polymers, and Small-Molecule:Polymer Blend Transistors by Simple Admixing of the Lewis Acid p-Dopant  $B(C_6F_5)_3$

*Julianna Panidi, Alexandra F. Paterson, Dongyoon Khim, Zhuping Fei, Yang Han, Leonidas Tsetseris, George Vourlias, Panos A. Patsalas, Martin Heeney, and Thomas D. Anthopoulos\**

Copyright WILEY-VCH Verlag GmbH & Co. KGaA, 69469 Weinheim, Germany, 2016.

## Supporting Information

### Remarkable enhancement of the hole mobility in several organic small-molecules, polymers and small-molecule:polymer blend transistors by simple admixing of the Lewis acid p-dopant $B(C_6F_5)_3$

Julianna Panidi, Alexandra F. Paterson, Dongyoon Khim, Zhuping Fei, Yang Han, Leonidas Tsetseris, George Vourlias, Panos A. Patsalas, Martin Heeney, and Thomas D. Anthopoulos\*

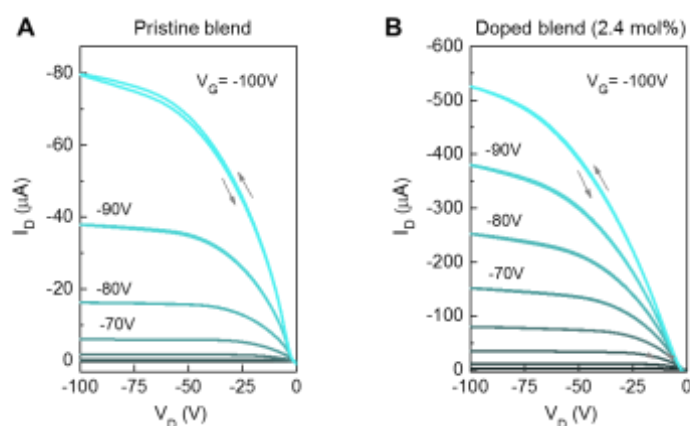

**Figure S1.** Output characteristics obtained for OTFTs based on, (a) pristine diF-TESADT:PTAA, and (b) diF-TESADT:PTAA: $B(C_6F_5)_3$  (2.4 mol%) (doped) semiconducting layers. The channel length and width of both OTFTs were  $W = 1$  mm and  $L = 40$   $\mu$ m.

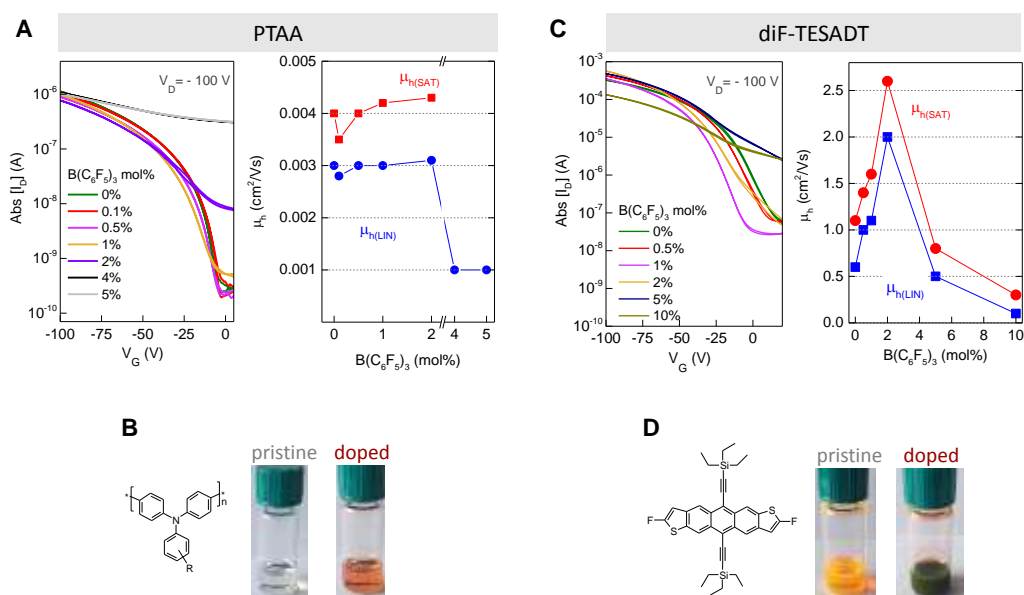

**Figure S2.** (a) Transfer characteristics and hole mobility ( $\mu_h$ ) of OTFTs based on pristine and  $B(C_6F_5)_3$ -doped PTAA. (b) Photograph of the PTAA solution before and after  $B(C_6F_5)_3$  addition (5% mol). (c) Transfer characteristics and hole mobility ( $\mu_h$ ) of OTFTs based on pristine and  $B(C_6F_5)_3$ -doped diF-TESADT. (d) Photograph of the diF-TESADT solution before and after  $B(C_6F_5)_3$  addition (5% mol).

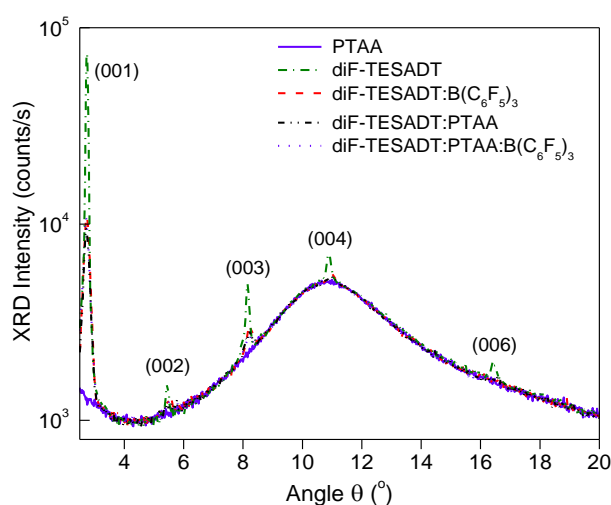

**Figure S3.** Raw XRD data of five reference samples (PTAA, diF-TESADT, diF-TESADT:B(C<sub>6</sub>F<sub>5</sub>)<sub>3</sub>, diF-TESADT:PTAA, and diF-TESADT:PTAA:B(C<sub>6</sub>F<sub>5</sub>)<sub>3</sub>). For all samples, there is a wide peak centered at 11°, which is due to the glass substrate. The contribution of the glass substrate was subtracted from the XRD scans in order to have a more precise view of the X-ray diffractograms of the measured samples. The quantitative results of the XRD analysis of the three stronger peaks are presented in **Tables S1-S4**. Note that the signal-to-noise ratio of the (004) peak of the diF-TESADT:B(C<sub>6</sub>F<sub>5</sub>)<sub>3</sub> sample was not adequate to fit.

**Table S1:** The Bragg angles of the three stronger peaks of the films.

| Sample                                                         | (001) Bragg angle (°) | (003) Bragg angle (°) | (004) Bragg angle (°) |
|----------------------------------------------------------------|-----------------------|-----------------------|-----------------------|
| diF-TESADT                                                     | 2.74126               | 8.14911               | 10.89099              |
| diF-TESADT:B(C <sub>6</sub> F <sub>5</sub> ) <sub>3</sub>      | 2.73683               | 8.22051               | 11.01698              |
| diF-TESADT:PTAA                                                | 2.72819               | 8.19169               | 10.99867              |
| diF-TESADT:PTAA:B(C <sub>6</sub> F <sub>5</sub> ) <sub>3</sub> | 2.7183                | 8.16899               | N/A                   |

**Table S2:** The *d*-spacing of the three stronger peaks of the films; in parentheses are the equivalent values of the *d*<sub>001</sub>.

| Sample                                                                    | (001) <i>d</i> -spacing (nm) | (003) <i>d</i> -spacing (nm) | (004) <i>d</i> -spacing (nm) |
|---------------------------------------------------------------------------|------------------------------|------------------------------|------------------------------|
| diF-TESADT                                                                | 1.61189                      | 0.54321<br>(1.62963)         | 0.40753<br>(1.63012)         |
| diF-TESADT:B(C <sub>6</sub> F <sub>5</sub> ) <sub>3</sub> (2.4 mol%)      | 1.6145                       | 0.53852<br>(1.61556)         | 0.40293<br>(1.61172)         |
| diF-TESADT:PTAA                                                           | 1.61961                      | 0.54041<br>(1.62123)         | 0.40359<br>(1.61436)         |
| diF-TESADT:PTAA:B(C <sub>6</sub> F <sub>5</sub> ) <sub>3</sub> (2.4 mol%) | 1.6255                       | 0.5419<br>(1.62570)          | N/A                          |

**Table S3:** The vertical grain size *G<sub>z</sub>* determined from the three stronger peaks of the films. Note that with increasing order of diffraction the accuracy of the calculation is substantially improved. *G<sub>z</sub>* is an indicator of the vertical crystallinity.

| Sample | (001) <i>G<sub>z</sub></i> (nm) | (003) <i>G<sub>z</sub></i> (nm) | (004) <i>G<sub>z</sub></i> (nm) |
|--------|---------------------------------|---------------------------------|---------------------------------|
|--------|---------------------------------|---------------------------------|---------------------------------|

|                                                                           |          |          |          |
|---------------------------------------------------------------------------|----------|----------|----------|
| diF-TESADT                                                                | 269.5928 | 50.04775 | 57.50282 |
| diF-TESADT:B(C <sub>6</sub> F <sub>5</sub> ) <sub>3</sub> (2.4 mol%)      | 130.9763 | 36.40266 | 54.08023 |
| diF-TESADT:PTAA                                                           | 84.66673 | 27.16047 | 12.48876 |
| diF-TESADT:PTAA:B(C <sub>6</sub> F <sub>5</sub> ) <sub>3</sub> (2.4 mol%) | 44.16745 | 13.96916 | N/A      |

**Table S4:** The microstrain  $\epsilon_s$  determined from the three stronger peaks of the films. Note that with increasing order of diffraction the accuracy of the calculation is substantially improved.  $\epsilon_s$  is an indicator of the lateral crystallinity.

| Sample                                                                    | (001) $\epsilon_s$ | (003) $\epsilon_s$     | (004) $\epsilon_s$    |
|---------------------------------------------------------------------------|--------------------|------------------------|-----------------------|
| diF-TESADT                                                                | 0.00642            | 0.00481                | 0.02201               |
| diF-TESADT:B(C <sub>6</sub> F <sub>5</sub> ) <sub>3</sub> (2.4 mol%)      | 0.01686            | 0.03805                | 0.03792               |
| diF-TESADT:PTAA                                                           | 0.01399            | 0.05925                | $6.46 \times 10^{-8}$ |
| diF-TESADT:PTAA:B(C <sub>6</sub> F <sub>5</sub> ) <sub>3</sub> (2.4 mol%) | 0.00505            | $1.94 \times 10^{-16}$ | N/A                   |

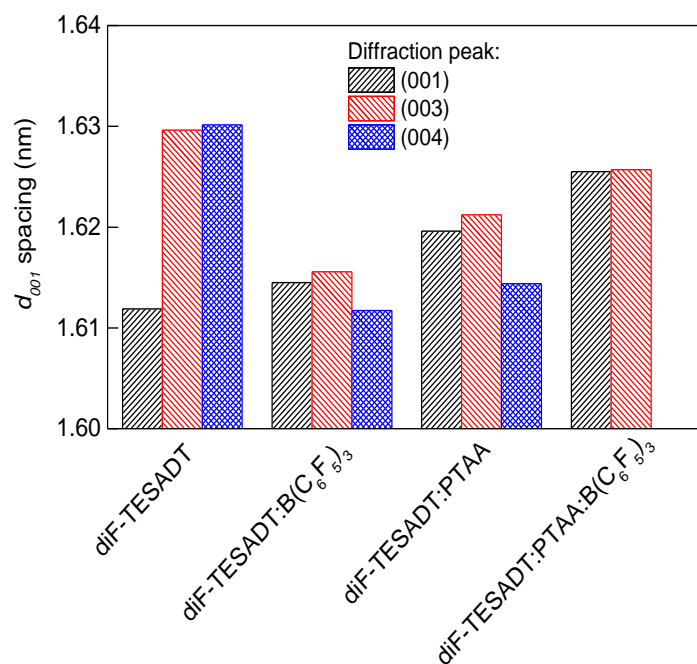

**Figure S4.** The  $d_{001}$  spacing for the four crystalline samples as determined by XRD peak profile analysis of the (001), (003) and (004) XRD peaks.

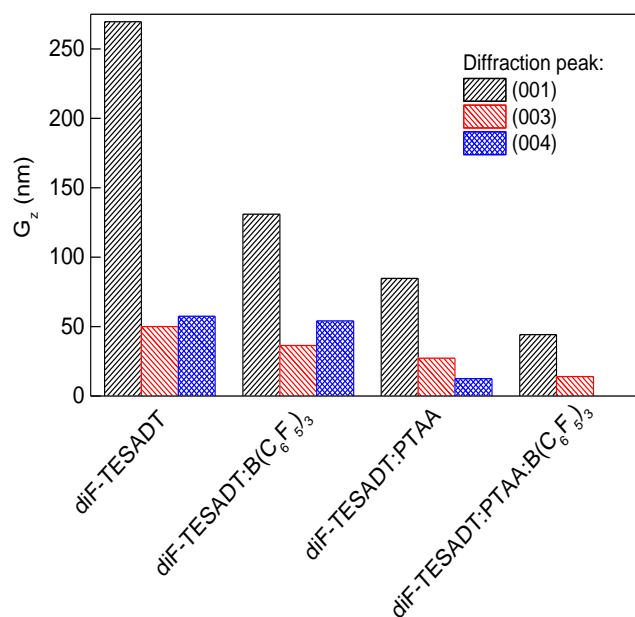

**Figure S5.** The vertical grain size for the four crystalline samples as determined by XRD peak profile analysis.

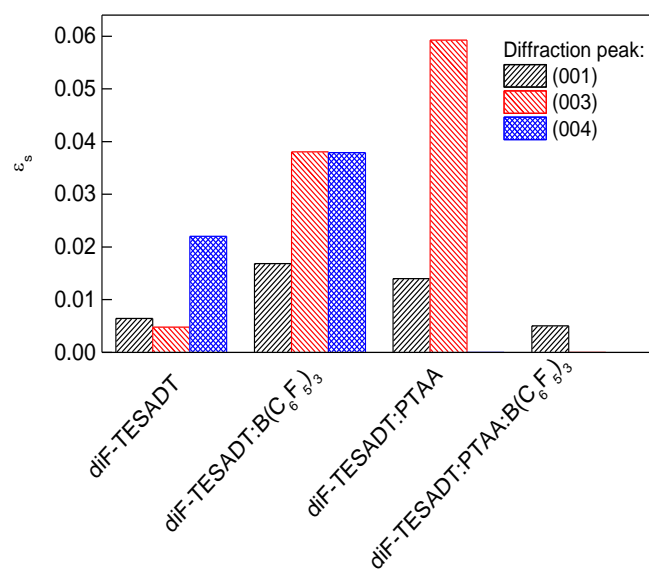

**Figure S6.** Microstrain ( $\epsilon_s$ ) for the four polycrystalline samples as determined by XRD peak profile analysis.

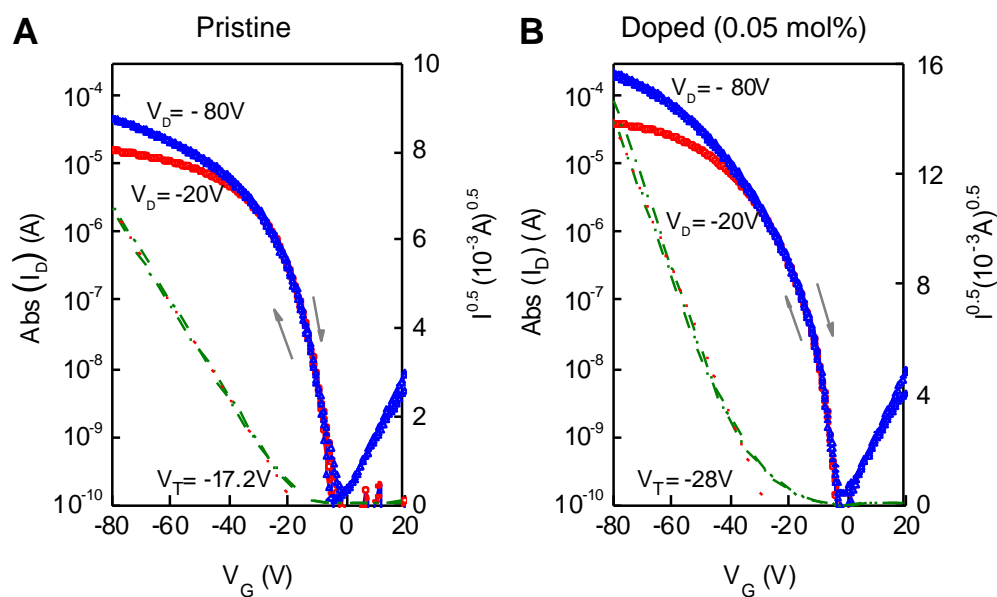

**Figure S7.** Transfer characteristics measured for OTFTs based on: (a) C<sub>8</sub>BTBT:C<sub>16</sub>IDT-BT (pristine), and (b) C<sub>8</sub>BTBT:C<sub>16</sub>IDT-BT:B(C<sub>6</sub>F<sub>5</sub>)<sub>3</sub> (0.05 mol%) (doped). The channel width ( $W$ ) and length ( $L$ ) were 1 mm and 0.08 mm, respectively.

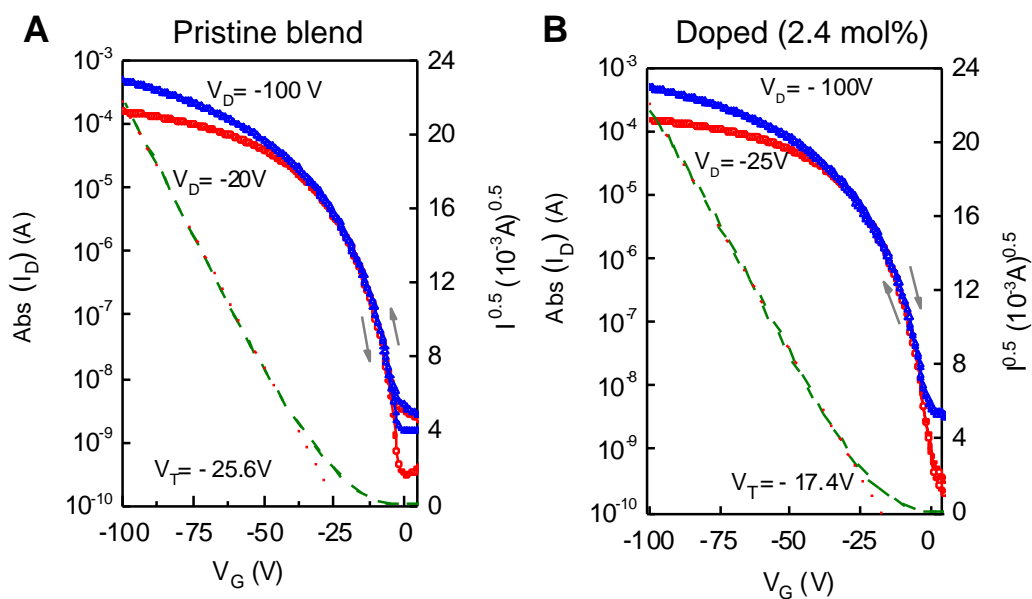

**Figure S8.** Transfer characteristics measured for OTFTs based on a pristine and a B(C<sub>6</sub>F<sub>5</sub>)<sub>3</sub> (2.4 mol%)-doped TIPS-pentacene:PTAA blend layer. The transistor channel width and length were 1 mm and 0.05 mm, respectively.

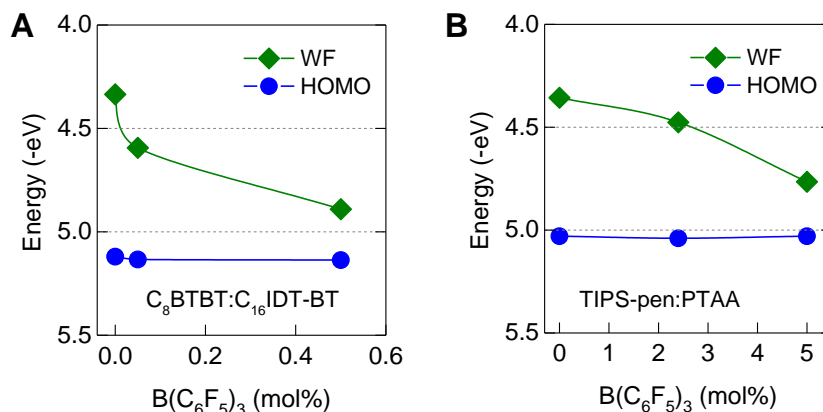

**Figure S9.** Work function ( $\phi$ ) and HOMO energy versus B(C<sub>6</sub>F<sub>5</sub>)<sub>3</sub> loading (mol%) for C<sub>8</sub>-BTBT:C<sub>16</sub>IDT-BT (a), and TIPS-pentacene:PTAA (b).

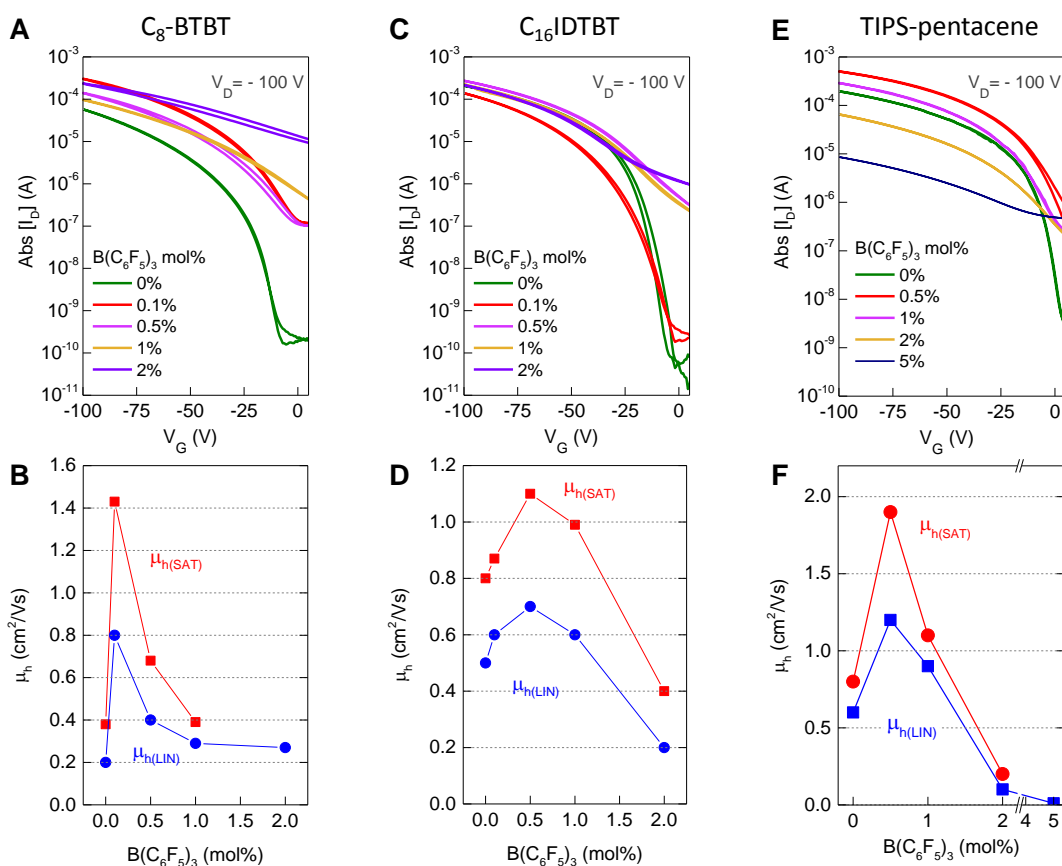

**Figure S10.** Transfer characteristics (a) and hole mobility calculated from the linear ( $\mu_{h(\text{LIN})}$ ) and saturation ( $\mu_{h(\text{SAT})}$ ) regimes (b) for OTFTs based on pristine and B(C<sub>6</sub>F<sub>5</sub>)<sub>3</sub>-doped C<sub>8</sub>-BTBT. Transfer characteristics (c) and hole mobility calculated from the linear ( $\mu_{h(\text{LIN})}$ ) and saturation ( $\mu_{h(\text{SAT})}$ ) regimes (d) for OTFTs based on pristine and B(C<sub>6</sub>F<sub>5</sub>)<sub>3</sub>-doped C<sub>16</sub>IDT-BT. Transfer characteristics (e) and hole mobility calculated from the linear ( $\mu_{h(\text{LIN})}$ ) and saturation ( $\mu_{h(\text{SAT})}$ ) regimes (f) for OTFTs based on pristine and B(C<sub>6</sub>F<sub>5</sub>)<sub>3</sub>-doped TIPS-pentacene.

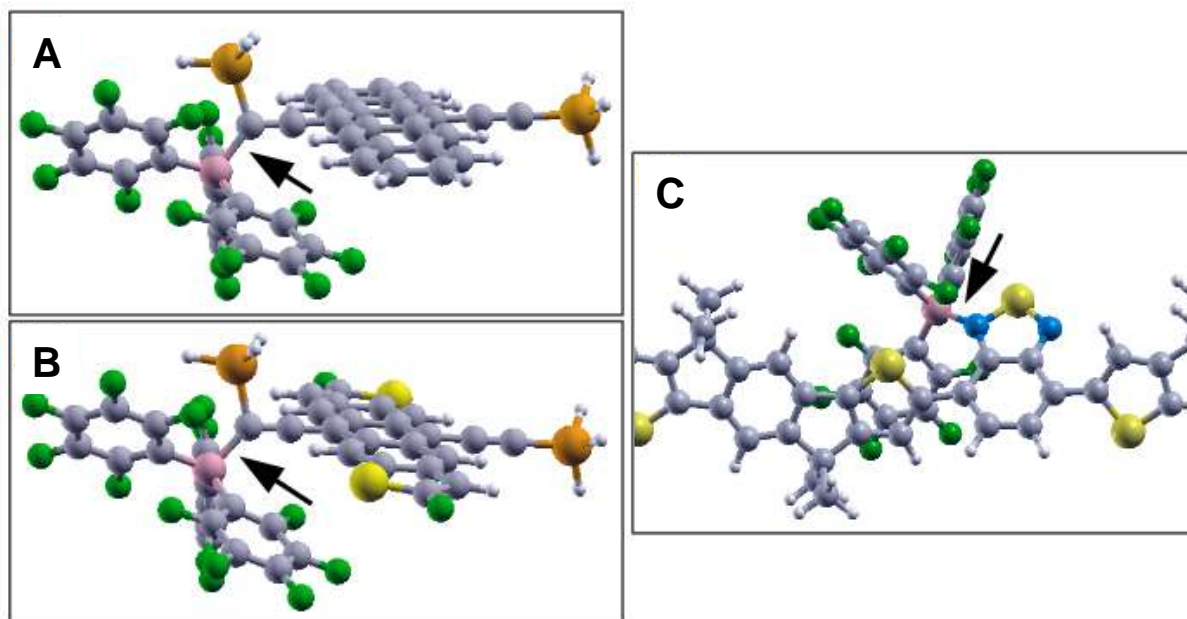

**Figure S11.** Adduct complexes between a  $B(C_6F_5)_3$  molecule and (a) a TIPS-pentacene molecule, (b) a diF-TESADT and (c) a  $C_{16}$ IDT-BT polymer chain (C: grey, H: white, B: pink, F: green, Si: orange, S: yellow, N: blue spheres). Their energies are, respectively, 0.02 eV, 0.07 eV and 0.06 eV higher than that of corresponding physisorbed configurations. Arrows in (a) and (b) show the B-C bonds while in (c) the B-N bond. Long side chains are approximated with shorter groups, which account properly for steric effects in the cases considered.
